# Supplementary material for: Electrospun nanofibers of 2D Cr2CTx MXene embedded in PVA for efficient electrocatalytic water splitting
Source: Royal Society of Chemistry journal article supplement (doi:10.1039/d4nj02938k), 2024-01-01
Supplement: d4nj02938k1.pdf [file d4nj02938k1.pdf]

## Supplementary Information

### Electrospun Nanofibers of 2D $\text{Cr}_2\text{CT}_x$ MXene Embedded in PVA for Efficient Electrocatalytic Water Splitting

Madhushree R<sup>a</sup>, Chaithra K P<sup>a</sup>, Sunaja Devi K. R. <sup>a, \*</sup> and Vinod T. P. <sup>a, \*</sup>

Department of Chemistry, Christ University, Bengaluru, 560029, India.

\*Email: [sunajadevi.kr@christuniversity.in](mailto:sunajadevi.kr@christuniversity.in), <https://orcid.org/0000-0001-7826-1620>

[vinod.tp@christuniversity.in](mailto:vinod.tp@christuniversity.in), <https://orcid.org/0000-0001-5815-5230>

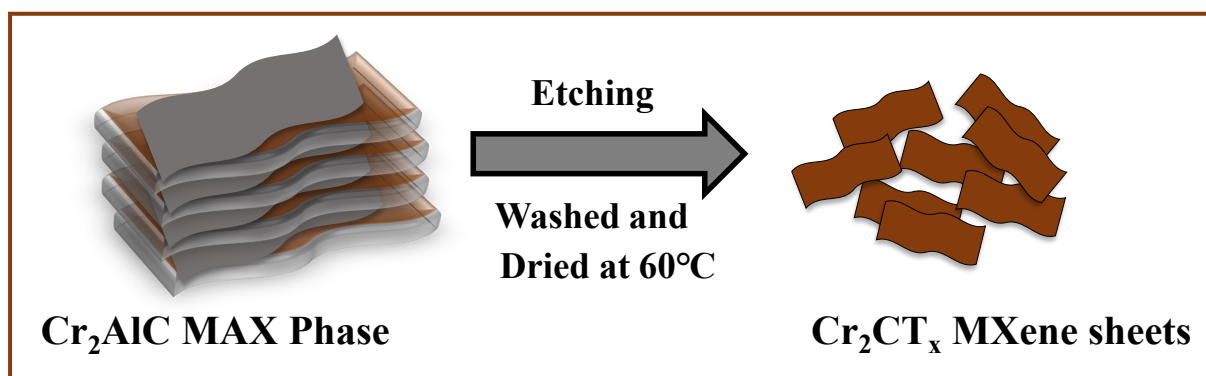

**Fig. S1.** Schematic illustration of the synthesis of  $\text{Cr}_2\text{CT}_x$  MXene sheets

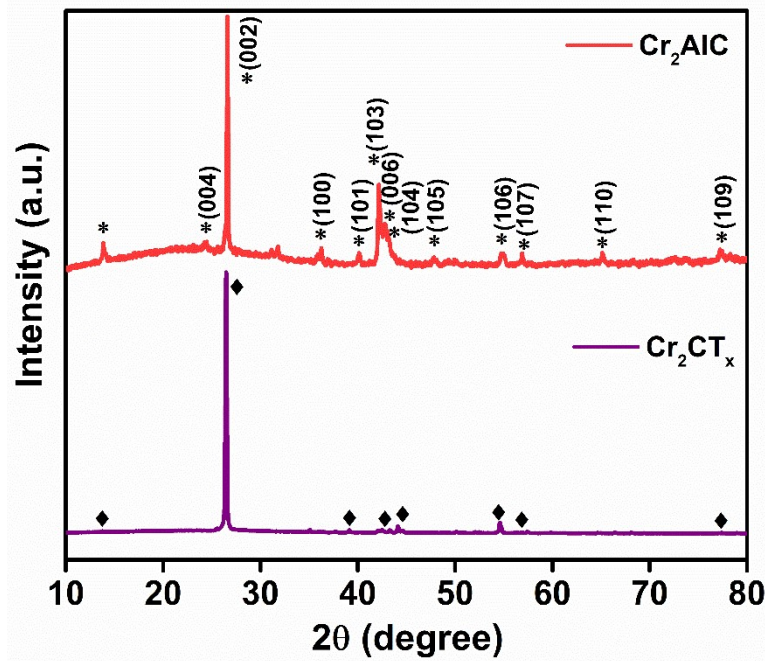

Fig. S2. XRD of  $\text{Cr}_2\text{AlC}$  MAX Phase and  $\text{Cr}_2\text{CT}_x$  MXene

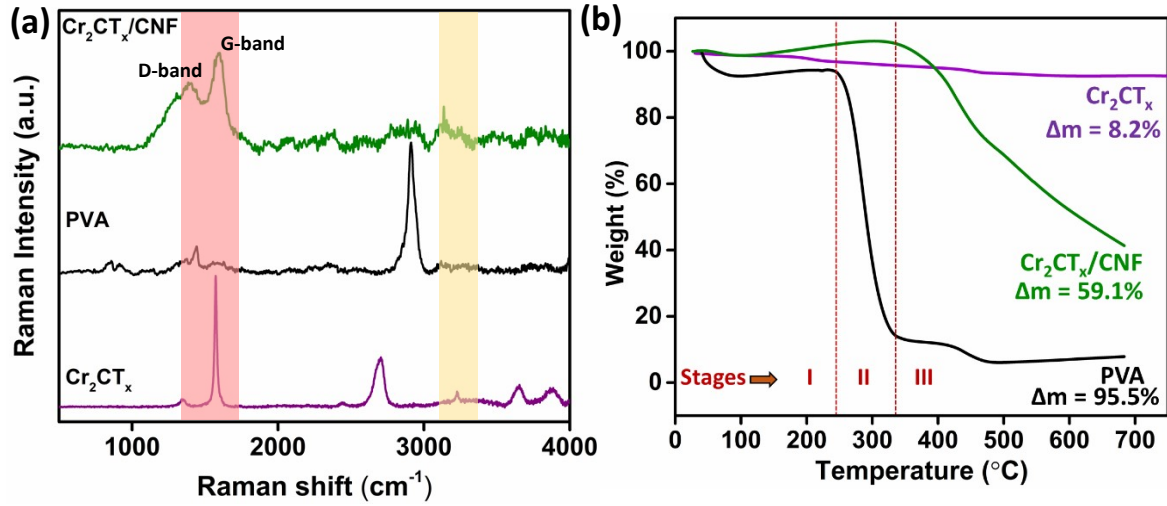

Fig. S3. (a) Raman spectra and (b) TGA profiles of  $\text{Cr}_2\text{CT}_x/\text{CNF}$ , PVA, and  $\text{Cr}_2\text{CT}_x$

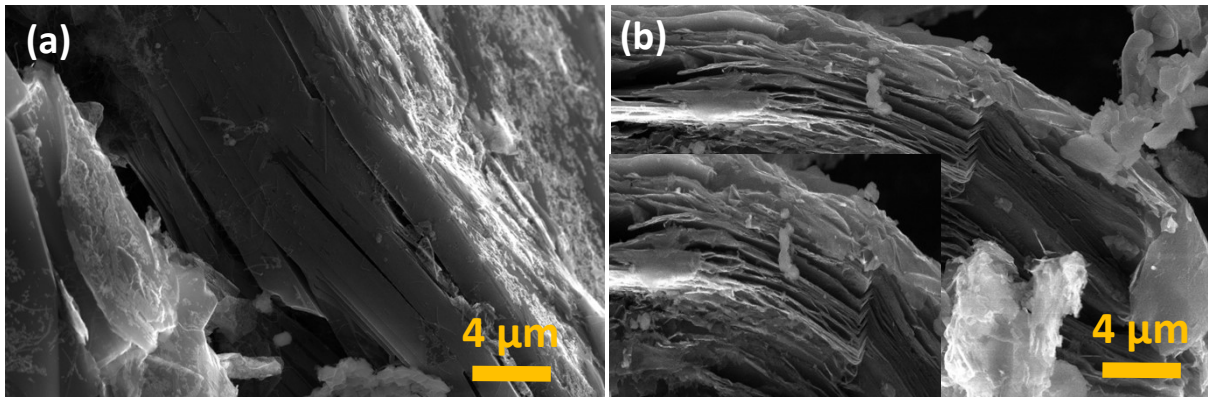

**Fig. S4.** SEM image of (a) Cr<sub>2</sub>AlC MAX Phase (b) Cr<sub>2</sub>CT<sub>x</sub> MXene

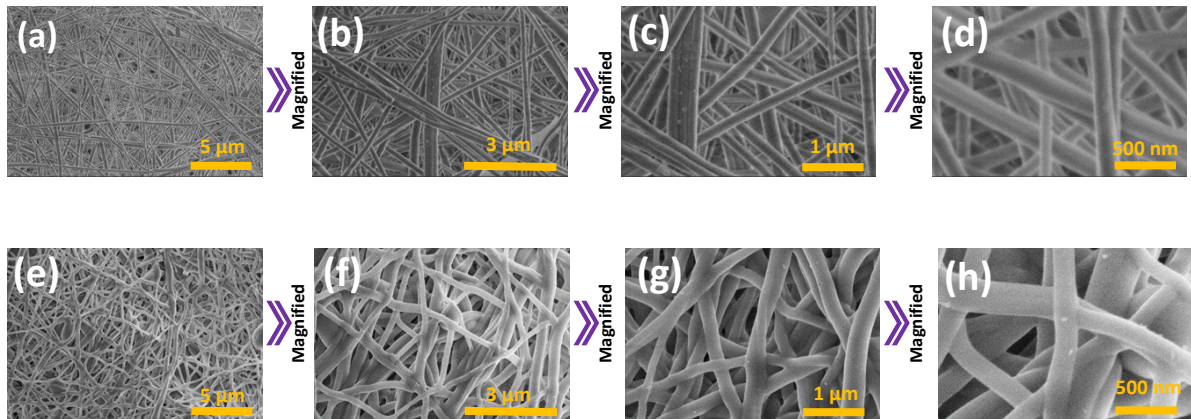

**Fig. S5.** SEM images of (a-d) Cr<sub>2</sub>CT<sub>x</sub>/CNF1 and (e-h) Cr<sub>2</sub>CT<sub>x</sub>/CNF

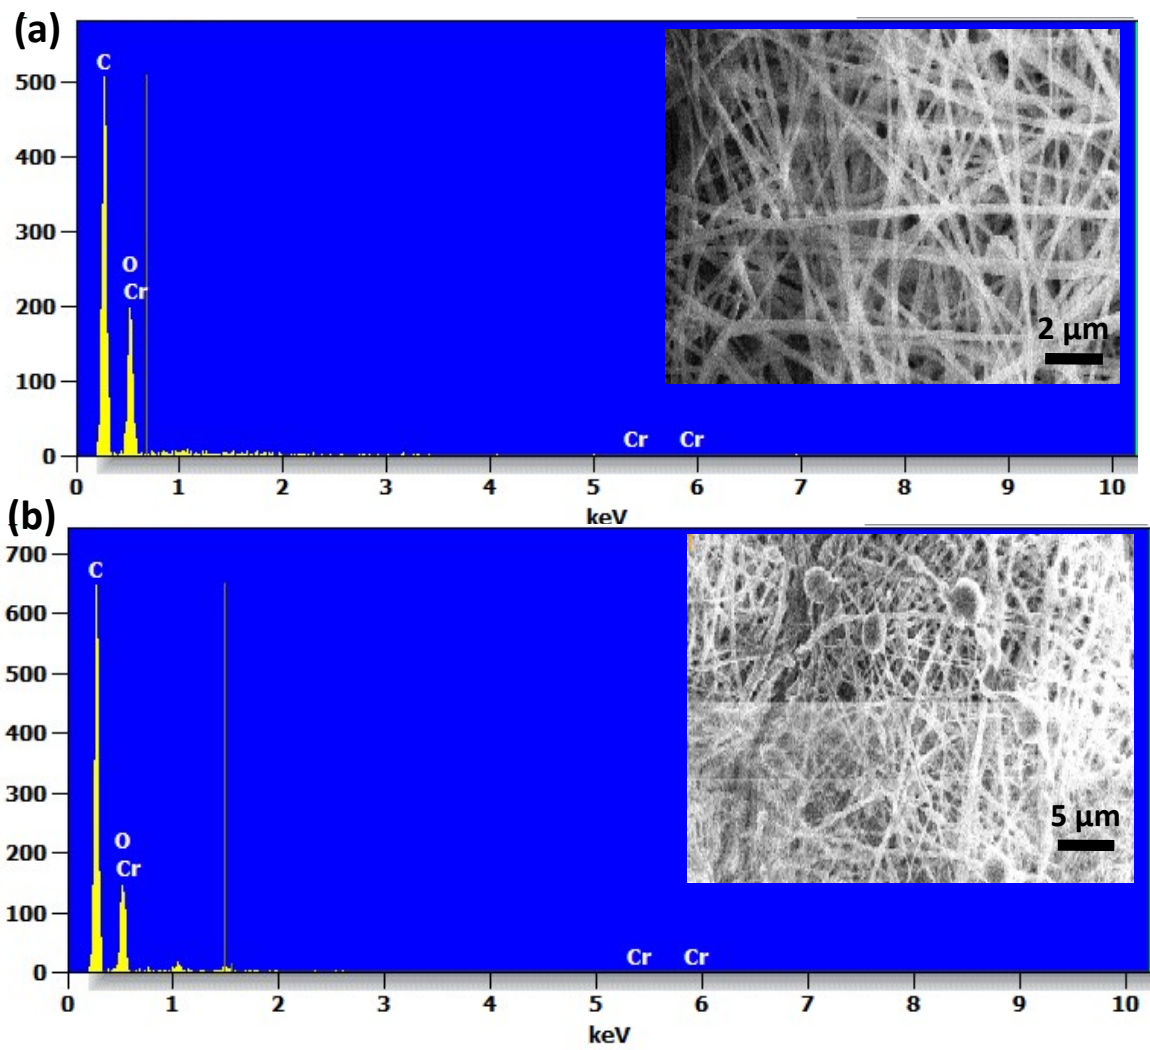

Fig. S6. EDX spectra (inset SEM image) of (a)  $\text{Cr}_2\text{CT}_x/\text{CNF1}$  and (b)  $\text{Cr}_2\text{CT}_x/\text{CNF}$

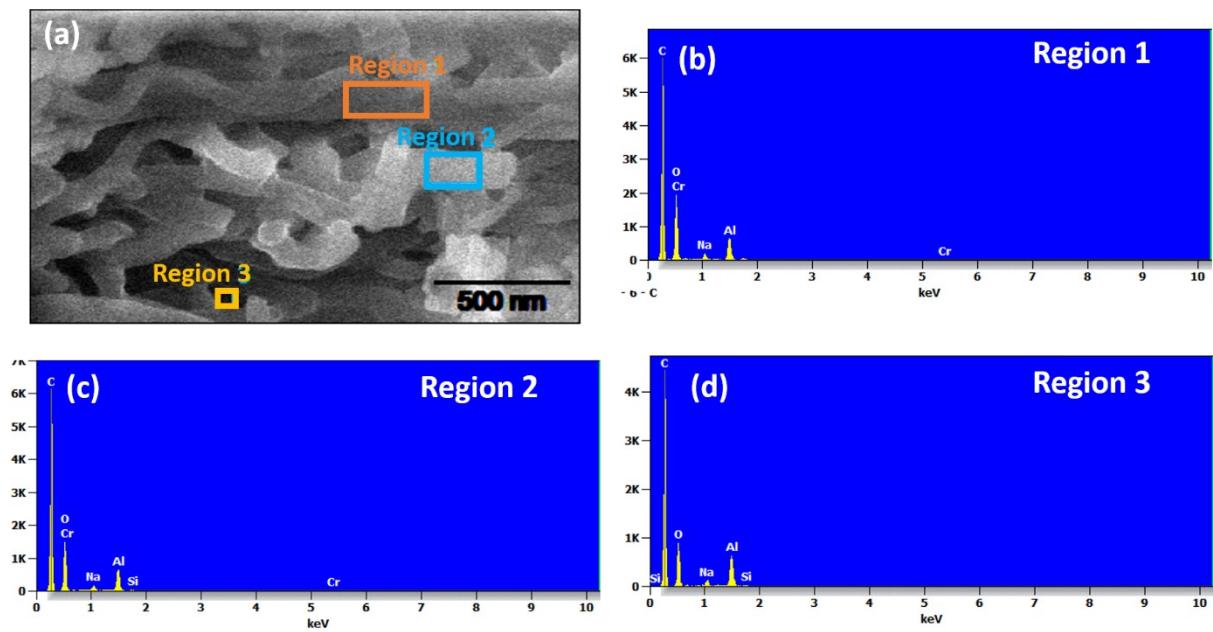

**Fig. S7.** Cross-sectional SEM images of  $\text{Cr}_2\text{CT}_x/\text{CNF}$  with various regions within the fiber matrix (regions 1 and 2) and outside the fiber matrix (region 3), Area EDX spectrum of  $\text{Cr}_2\text{CT}_x/\text{CNF}$  analyzed in (a) region 1, (b) region 2 and (c) region 3.

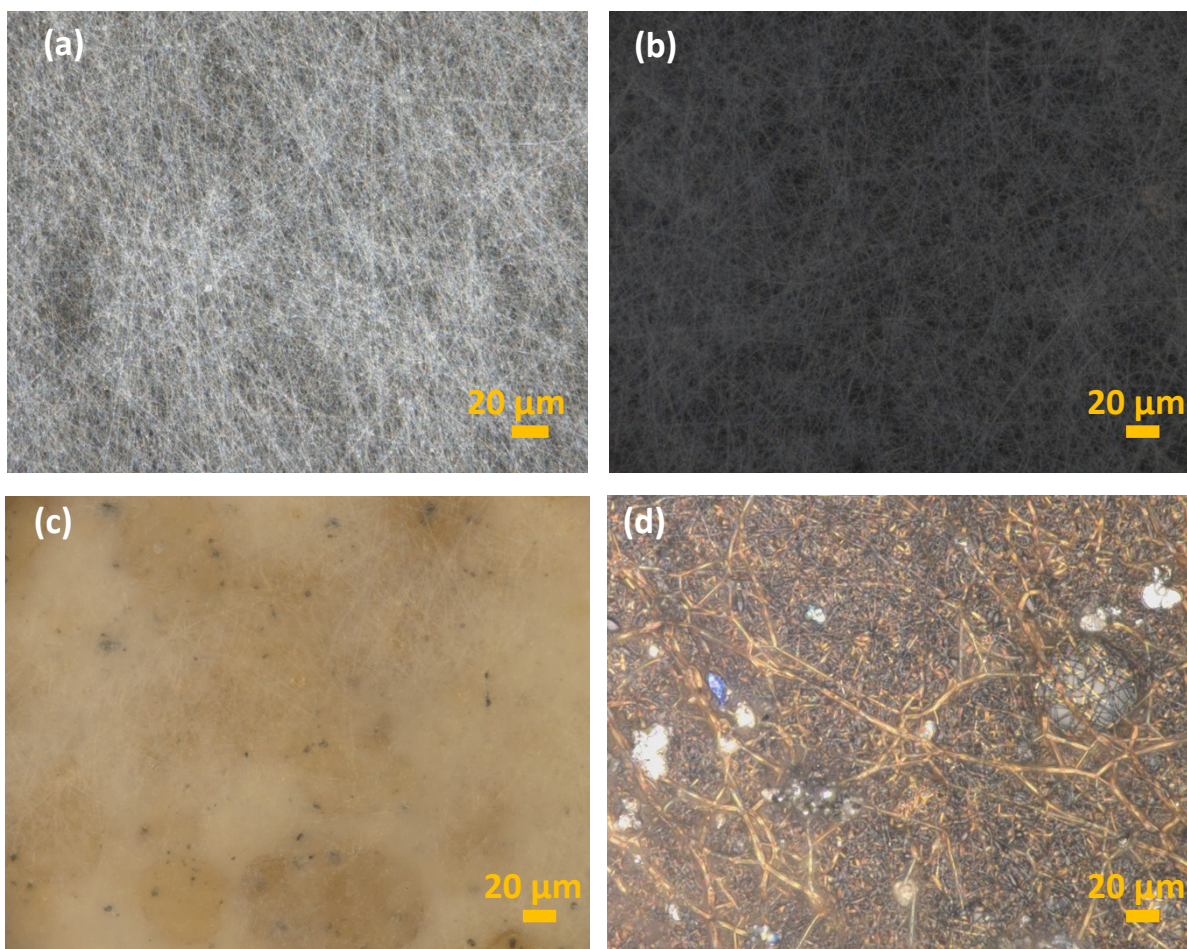

**Fig. S8.** Optical microscopic images of nanofiber mats of (a) PVA, (b)  $\text{Cr}_2\text{CT}_x$  /PVA, (c)  $\text{Cr}_2\text{CT}_x$ /CNF1 and (d)  $\text{Cr}_2\text{CT}_x$  /CNF

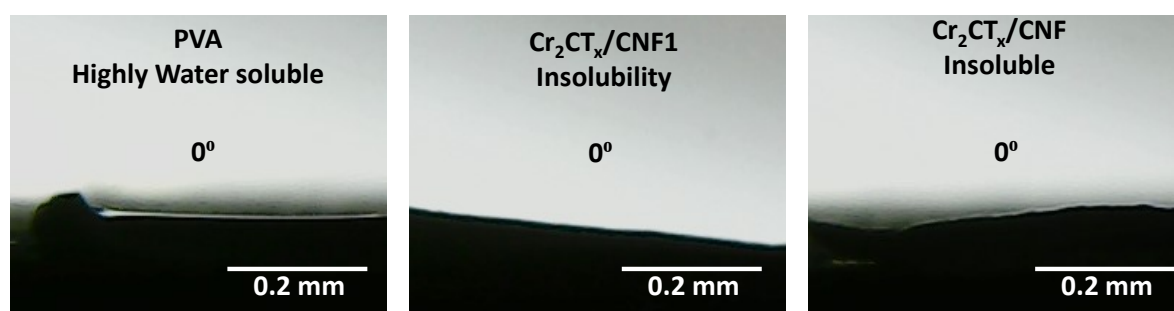

**Fig. S9.** Surface wettability of nanofiber samples. Magnified photographs of water droplets placed over the fibrous mats are shown in the images.

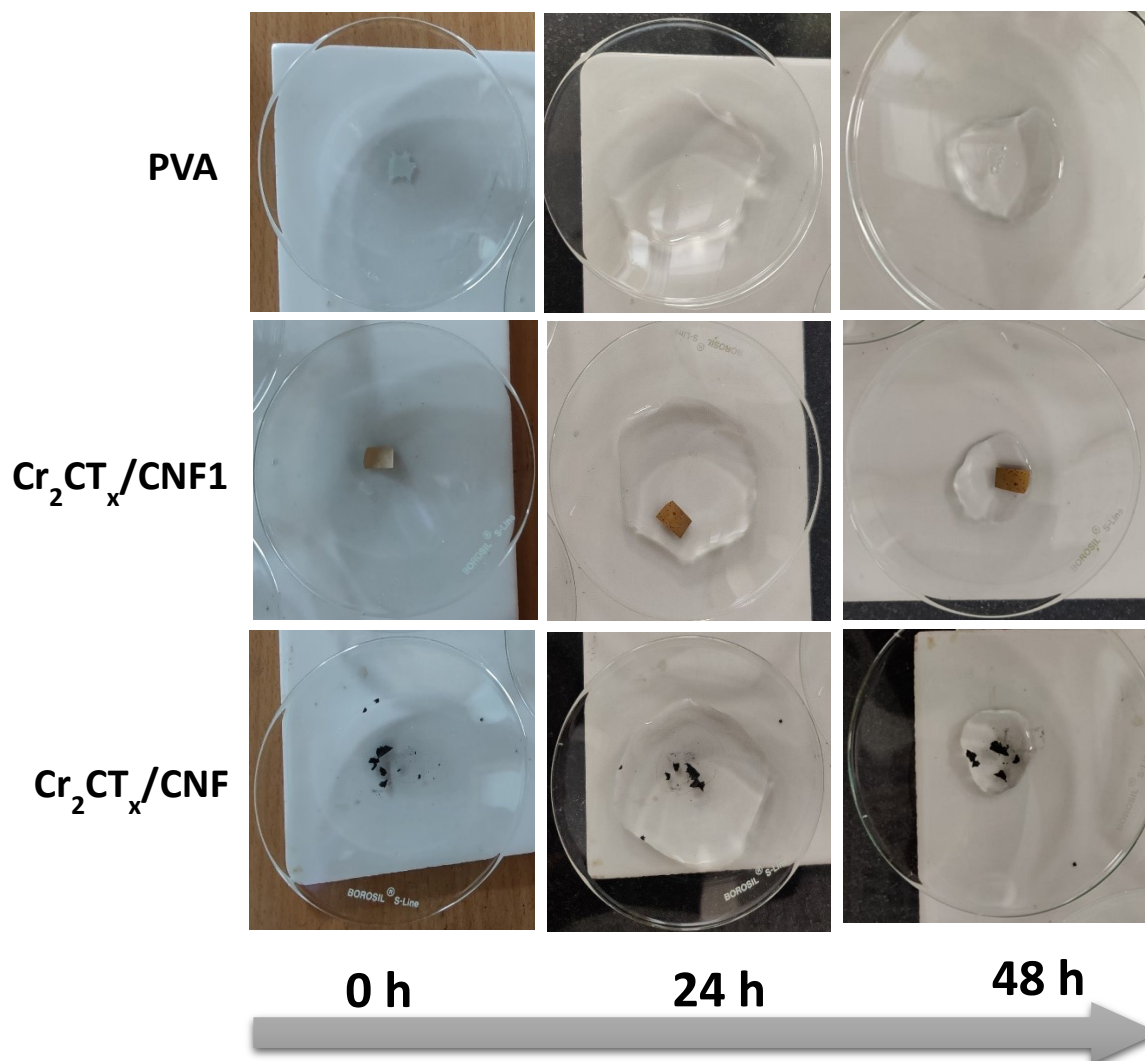

**Fig. S10.** Photographs showing the water Solubility of PVA,  $\text{Cr}_2\text{CT}_x/\text{CNF1}$  and  $\text{Cr}_2\text{CT}_x/\text{CNF}$  with time.

**Video S1.** Evidence for the insolubility of  $\text{Cr}_2\text{CT}_x/\text{CNF}$  compared the PVA nanofibrous mat.

(Uploaded separately)

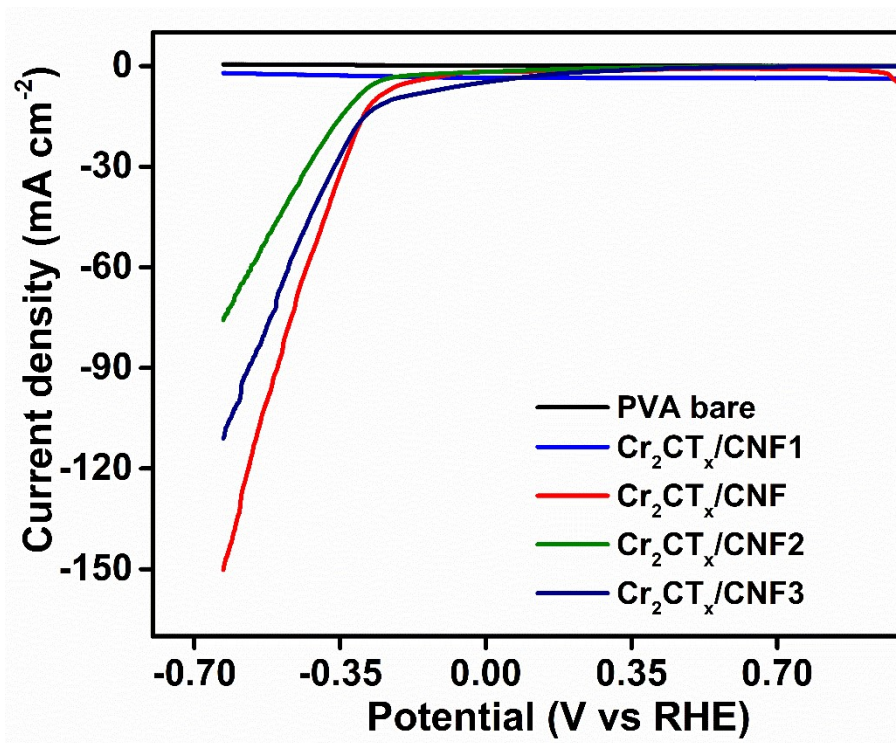

Fig. S11. Comparison of LSV profiles of PVA bare and various  $\text{Cr}_2\text{CT}_x/\text{CNF}$  obtained for HER

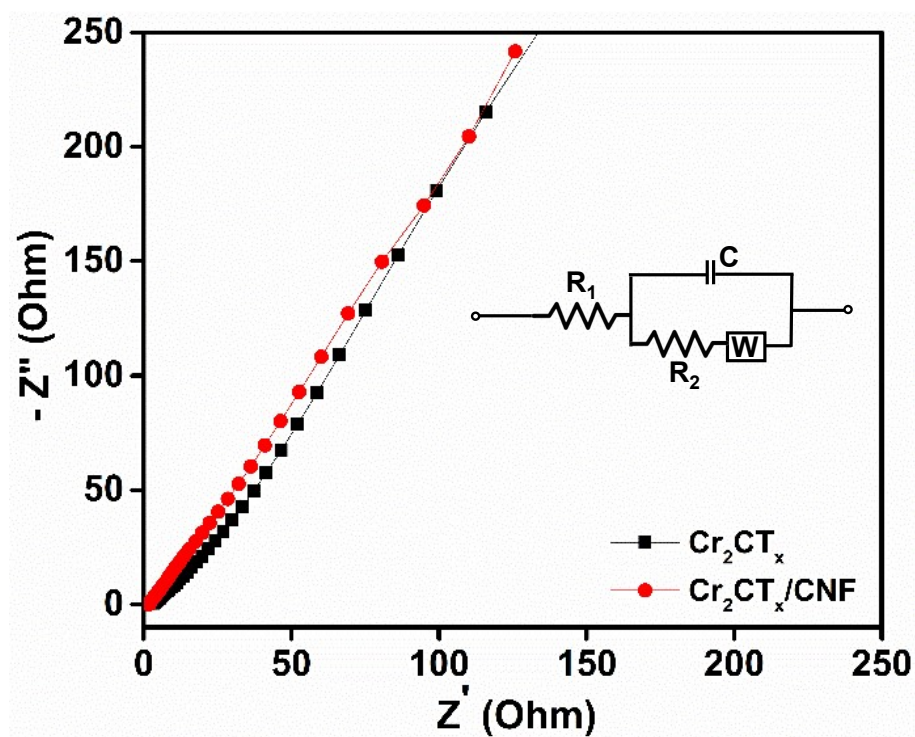

Fig. S12. Nyquist plot with fitted Randles circuit for HER performance



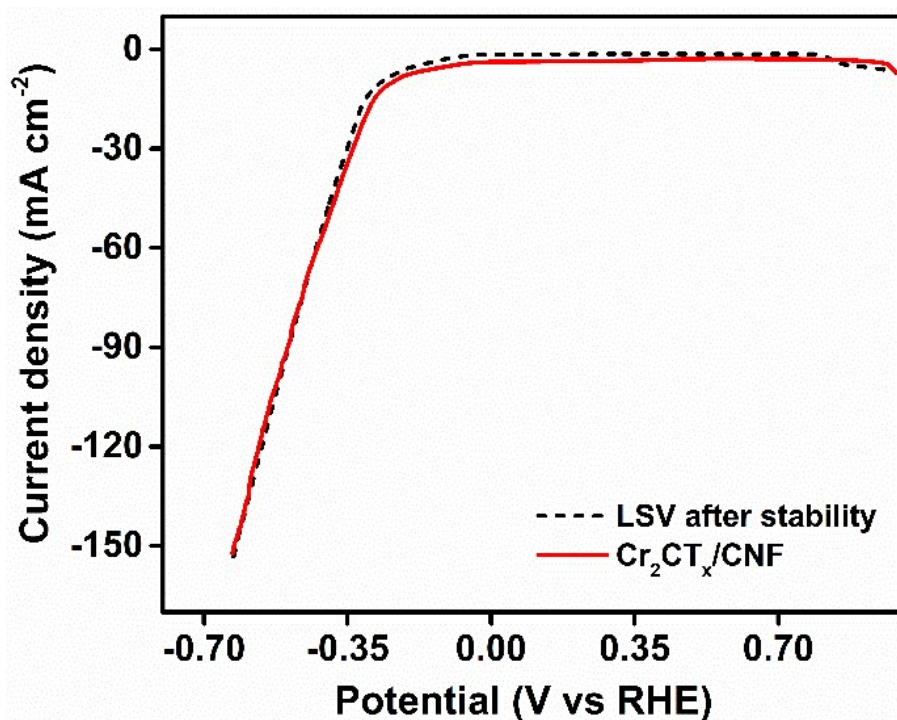

Fig. S13. LSV profile of  $\text{Cr}_2\text{CT}_x/\text{CNF}$  before and after stability check for HER

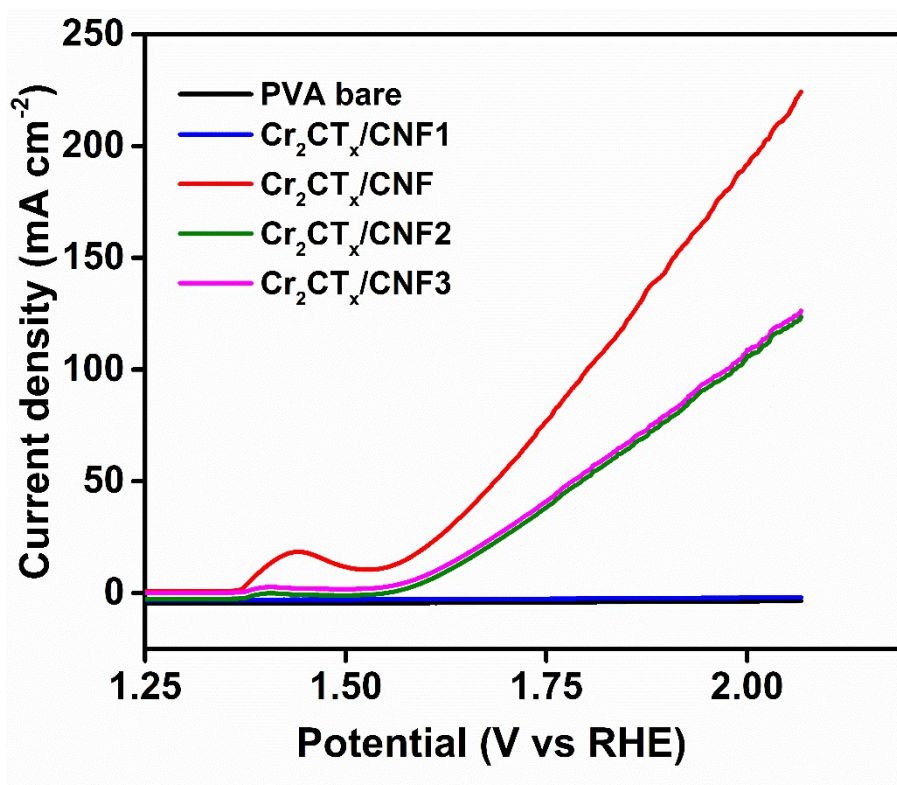

Fig. S14. Comparison of LSV profiles of PVA bare and various  $\text{Cr}_2\text{CT}_x/\text{CNF}$  obtained for HER

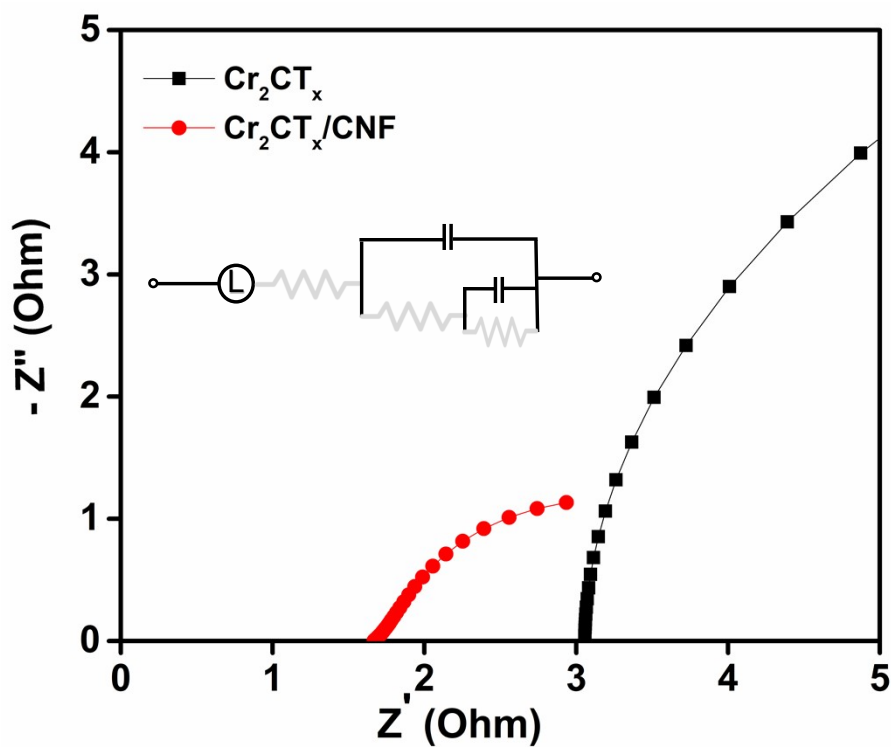

Fig. S15. Nyquist plot fitted Randles circuit for OER performance

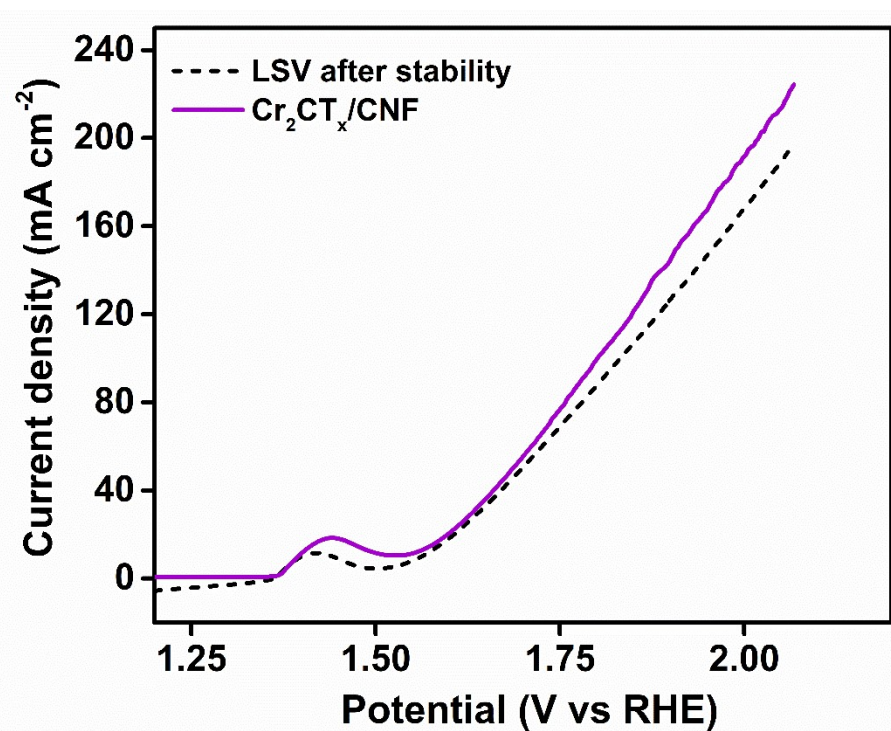

Fig. S16. LSV profile of Cr<sub>2</sub>CT<sub>x</sub>/CNF before and after stability check for OER

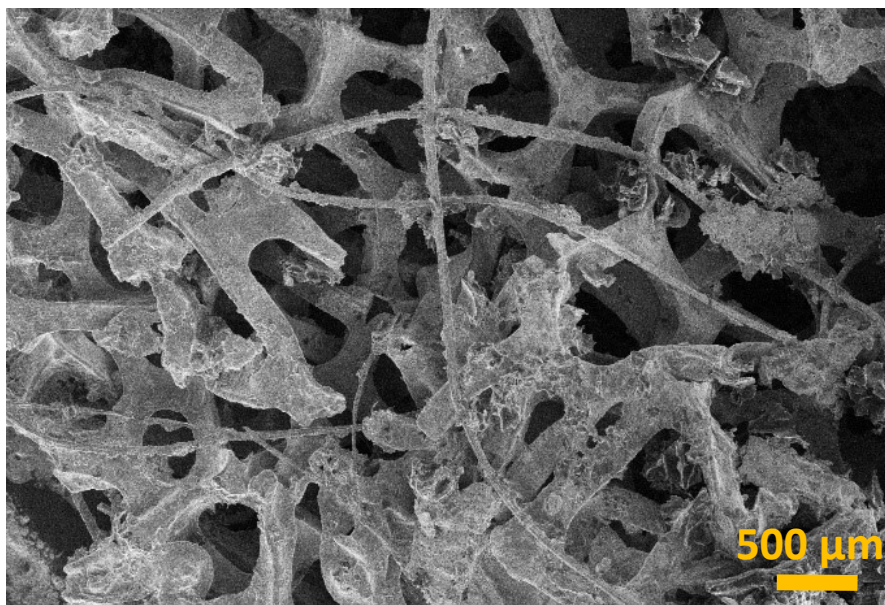

**Fig. S17.** SEM image of  $\text{Cr}_2\text{CT}_x/\text{CNF}$  after bulk electrolysis (stability test)

**Table S1.** Elemental compositions derived from the EDX analysis of prepared  $\text{Cr}_2\text{CT}_x/\text{CNF1}$  and  $\text{Cr}_2\text{CT}_x/\text{CNF}$

| Materials                            | Element present | Weight % | Atom % | Atom % Error |
|--------------------------------------|-----------------|----------|--------|--------------|
| $\text{Cr}_2\text{CT}_x/\text{CNF1}$ | C               | 43.21    | 51.91  | ±0.74        |
|                                      | O               | 51.79    | 46.71  | ±1.04        |
|                                      | Cr              | 4.99     | 1.39   | ±0.33        |
| $\text{Cr}_2\text{CT}_x/\text{CNF}$  | C               | 50.03    | 57.20  | ±0.71        |
|                                      | O               | 49.83    | 42.76  | ±1.05        |
|                                      | Cr              | 0.14     | 0.04   | ±0.07        |

**Table S2.** The weight and atomic percentage of elements present in the Cr<sub>2</sub>CT<sub>x</sub>/CNF were analyzed in various regions as shown in Fig. S7

| Position                           | Parameter    | C     | O     | Cr    | Al    | Na    | Si    |
|------------------------------------|--------------|-------|-------|-------|-------|-------|-------|
| Region 1<br>(within fiber matrix)  | Weight %     | 56.62 | 25.98 | 7.32  | 8.71  | 1.36  | -     |
|                                    | Atom %       | 68.71 | 23.67 | 2.05  | 4.71  | 0.86  | -     |
|                                    | Atom % Error | ±0.49 | ±2.51 | ±0.22 | ±0.12 | ±0.11 | -     |
| Region 2<br>(within fiber matrix)  | Weight %     | 57.34 | 26.97 | 3.73  | 9.48  | 2.20  | 0.28  |
|                                    | Atom %       | 68.31 | 24.12 | 1.03  | 5.03  | 1.37  | 0.14  |
|                                    | Atom % Error | ±0.41 | ±1.73 | ±0.11 | ±0.07 | ±0.08 | ±0.03 |
| Region 3<br>(outside fiber matrix) | Weight %     | 53.20 | 33.41 | -     | 11.50 | 1.89  | -     |
|                                    | Atom %       | 63.04 | 29.72 | -     | 6.06  | 1.17  | -     |
|                                    | Atom % Error | ±0.41 | ±0.47 | -     | ±0.10 | ±0.08 | -     |

**Table S3.** Comparison of HER, OER and OWS activity with reported literature.

| Electrocatalyst                                         | Polymer and Synthesis approach   | Reference electrode | Water splitting activity @10 mV cm <sup>-2</sup> | Ref.                |
|---------------------------------------------------------|----------------------------------|---------------------|--------------------------------------------------|---------------------|
| Sn/Mo <sub>2</sub> C/CNF                                | PAN/DMF solution Electrospinning | Hg/HgO              | 144 mV -HER                                      | 1                   |
| Co <sub>3</sub> W <sub>3</sub> C/CoP/N, P-Carbon fibers | PAN/DMF Electrospinning          | -                   | 139 mV -HER<br>200 mV - OER                      | 2                   |
| S,N-CNF/Co-NiO                                          | PAN/DMF Electrospinning          | Hg/HgO              | 169 mV - HER<br>247 mV - OER                     | 3                   |
| NiCo/CNF/N-doped carbon shell                           | Polydopamine Electrospinning     | Hg/HgO              | 220 mV - HER<br>0.40 V - OER                     | 4                   |
| <b>Cr<sub>2</sub>CT<sub>x</sub>/CNF</b>                 | <b>PVA Electrospinning</b>       | <b>SCE</b>          | <b>265 mV - HER<br/>250 mV - OER</b>             | <b>Present work</b> |

#### References

- 1 L. Zhang, K. Wei, J. Ma, J. Wang, Z. Liu, R. Xing and T. Jiao, *Appl. Surf. Sci.*, 2021, **566**, 150754.
- 2 Y. Zhang, W. Shi, L. Bo, Y. Shen, X. Ji, L. Xia, X. Guan, Y. Wang and J. Tong, *Chem. Eng. J.*, 2022, **431**, 134188.
- 3 S. Surendran, S. C. Jesudass, G. Janani, J. Y. Kim, Y. Lim, J. Park, M. Han, I. S. Cho and U. Sim, *Adv. Mater. Technol.*, DOI:10.1002/admt.202200572.
- 4 T. T. Gebremariam, F. Chen, Y. Jin, Q. Wang, J. Wang and J. Wang, *Catal. Sci. Technol.*, 2019, **9**, 2532–2542.
